# Supplementary material for: Enhancer repertoires are reshaped independently of early priming and heterochromatin dynamics during B cell differentiation
Source: PubMed Central journal article supplement (PMC4633987; doi:10.1038/ncomms9324), 2015-10-19
Supplement: ncomms9324-s1.pdf [file ncomms9324-s1.pdf]

## Supplementary Figures

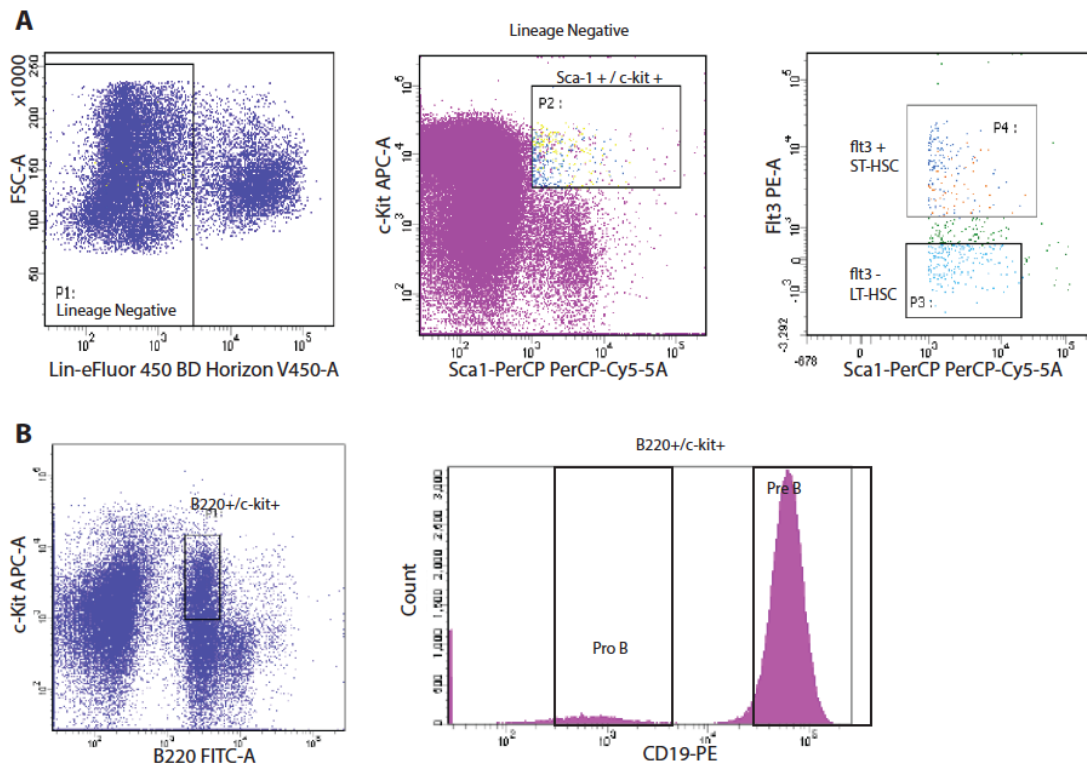

**Supplementary Fig. 1:** Nup-Hoxb4-HSCs are able to repopulate the hematopoietic system of irradiated Rag2 deficient mice.

**A.** Nup-hox4-HSCs were injected into irradiated Rag2 deficient mice. After 4 weeks, LT-HSCs (Lineage-, Sca+, c-kit+, flt3-) and ST-HSCs (Lineage-, Sca+, c-kit+, flt3+) were isolated from BM of recipient mice.

**B.** Pro B cells (B220+, c-kit+, CD19-) and Pre B cells (B220+, c-kit+, CD19+) were also isolated from recipient mice.

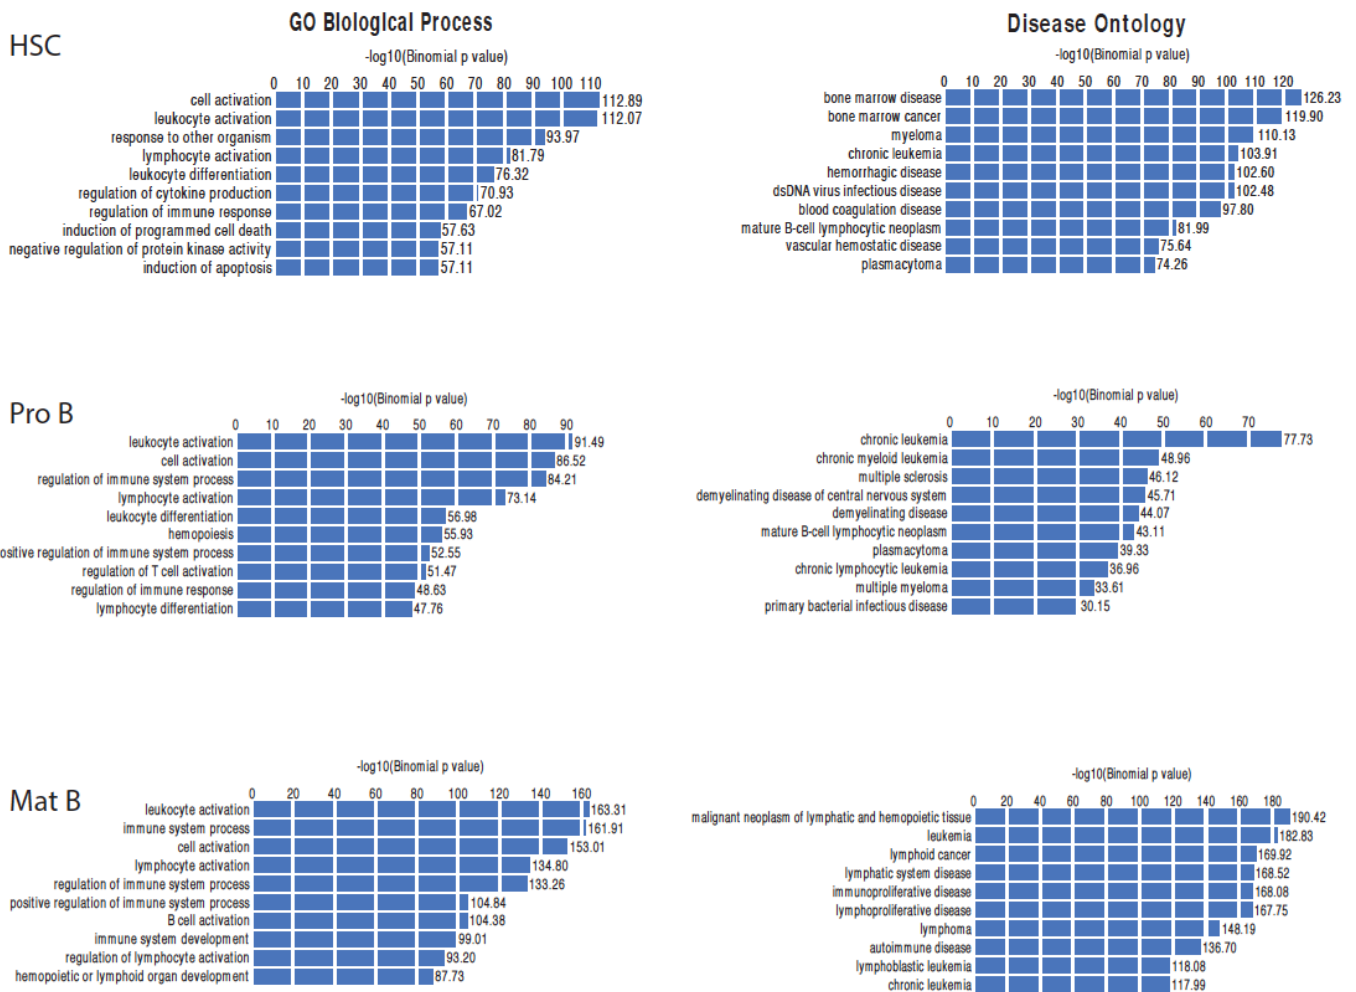

**Supplementary Fig. 2:** Biological functions and diseases associated with target genes of active enhancers in HSCs, Pro B and mature B cells.

Genomic coordinates of active enhancers were associated to their putative target genes; the resulting set of genes was submitted to gene annotation terms for biological processes and diseases using the Great software (<http://bejerano.stanford.edu/>) with default settings. Top ten hits and their associated p-values are shown.

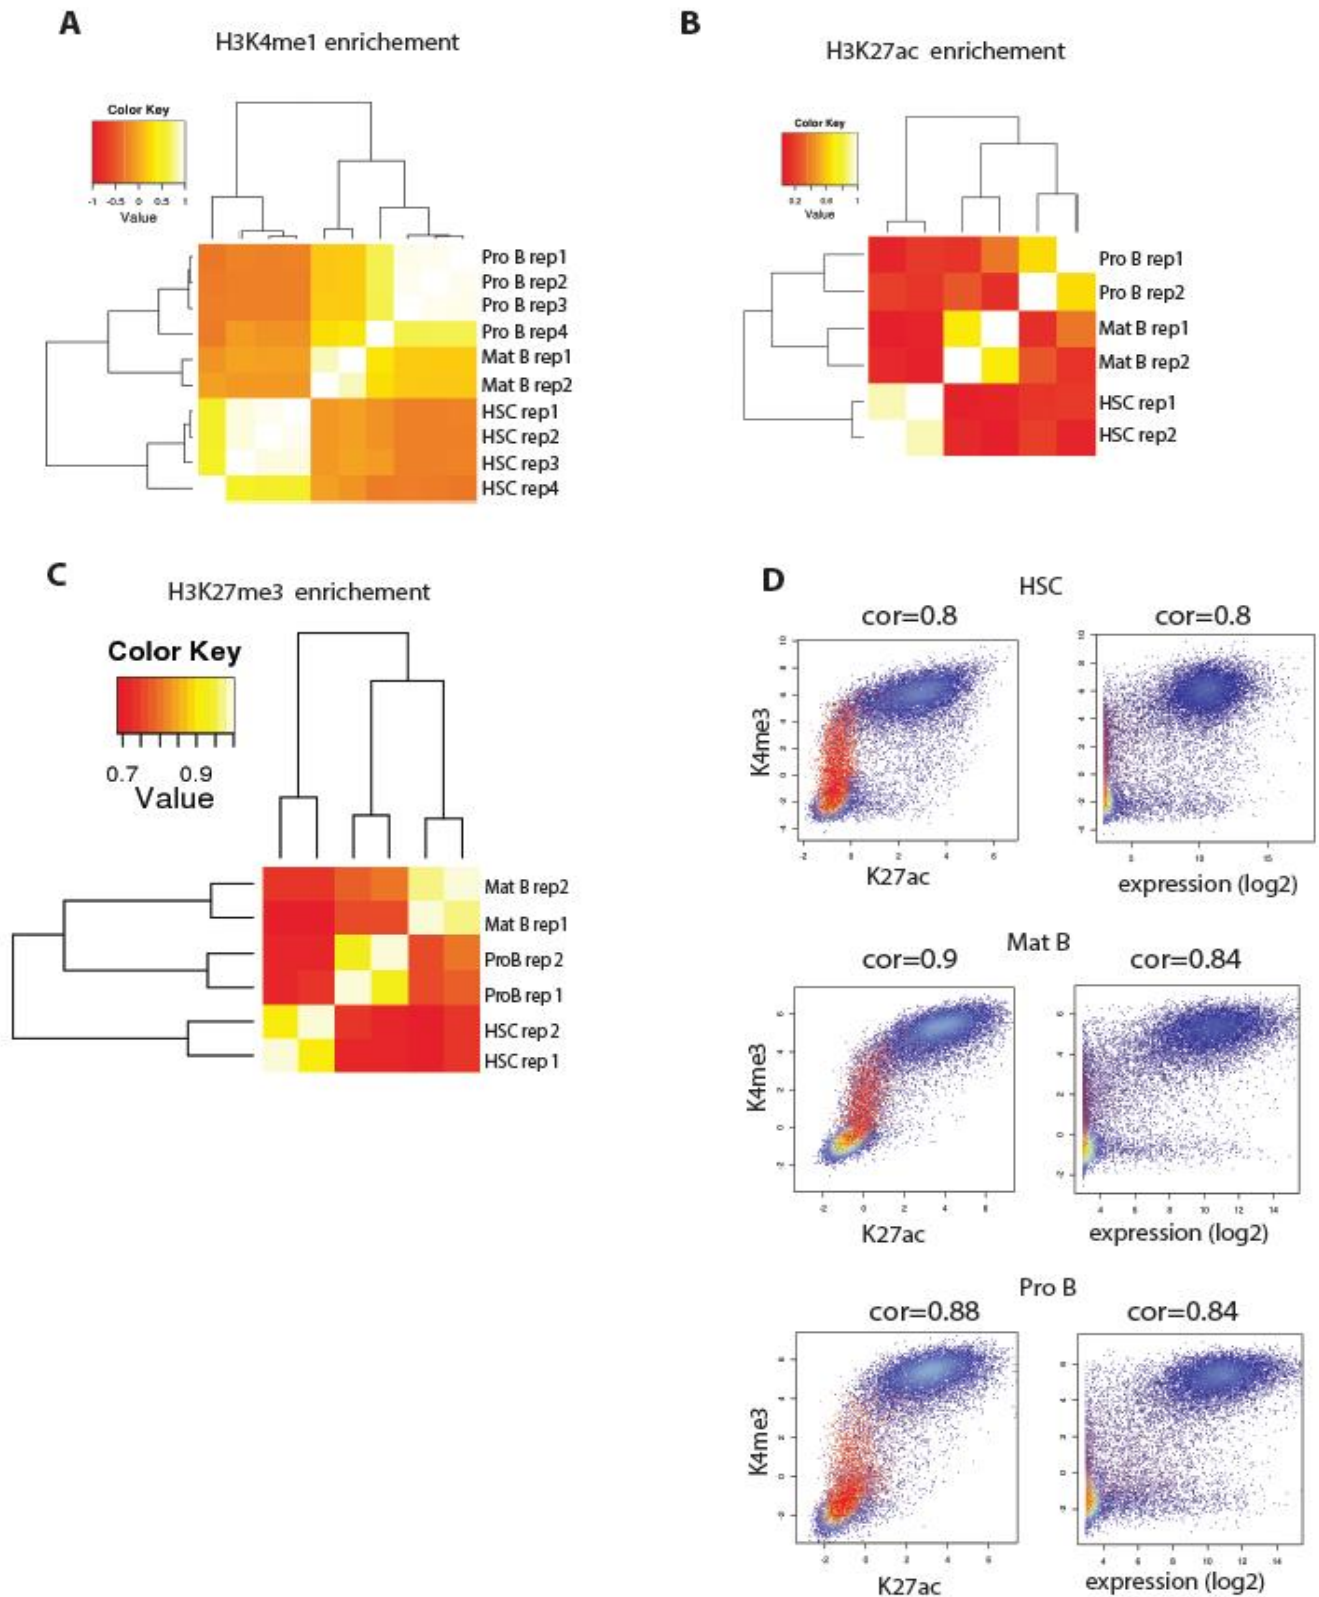

**Supplementary Fig. 3:** Correlation between replicates across samples.

**A and B.** Clustering of H3K4me1 (A) and H3K27ac (B) enrichment at enhancer elements based on Pearson correlation. Biological replicates for each stage cluster together.

**C.** Clustering of H3K27me3 enrichment at promoter regions.

**D.** Scatter plots of H3K4me3, H3K27ac and RNA sequencing signals at promoter regions. Promoters enriched in H3K27me3 are colored in red. Cor stands for Pearson correlation coefficient.

Behavior of poised enhancers during differentiation

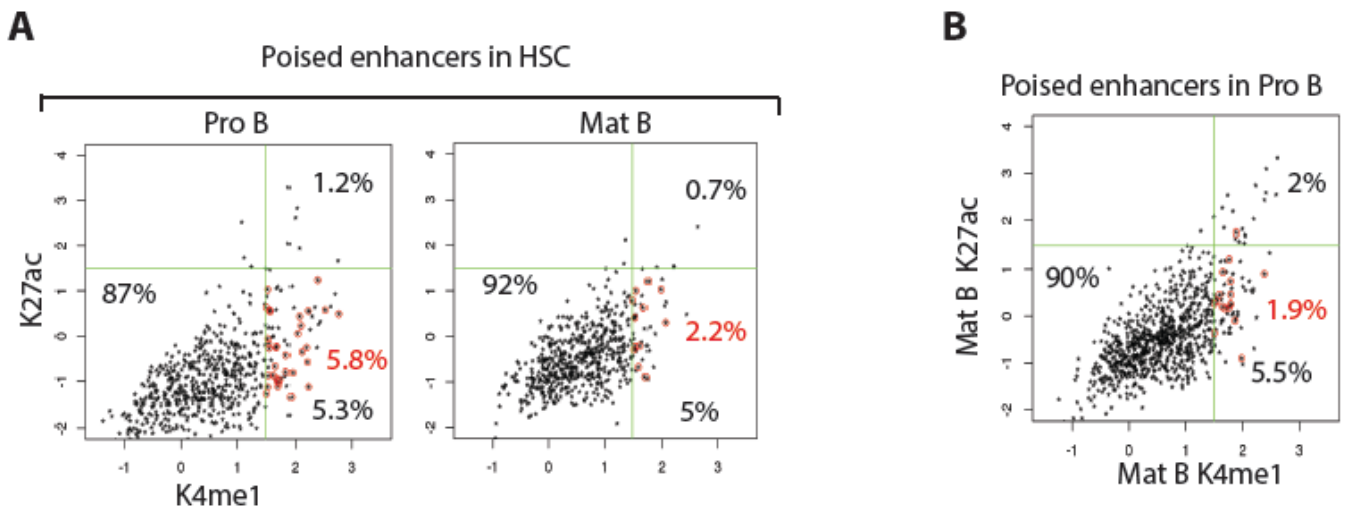

**Supplementary Fig. 4:** Behavior of poised enhancers during differentiation.

**A.** The chromatin state of enhancers poised in HSCs was investigated in Pro B and mature B cells. H3K4me1 and H3K27ac enrichment in the indicated cell types were calculated at genomic coordinates corresponding to poised enhancers in HSCs. Green lines indicate cut-offs used to select enriched regions for each signal. The proportions of the different population are indicated in the scatter plots. Poised enhancers in the indicated stages are marked by red circles and their proportions are indicated in red.

**B.** Similar to A, the chromatin state of enhancers poised in Pro B cells was investigated in mature B cells.

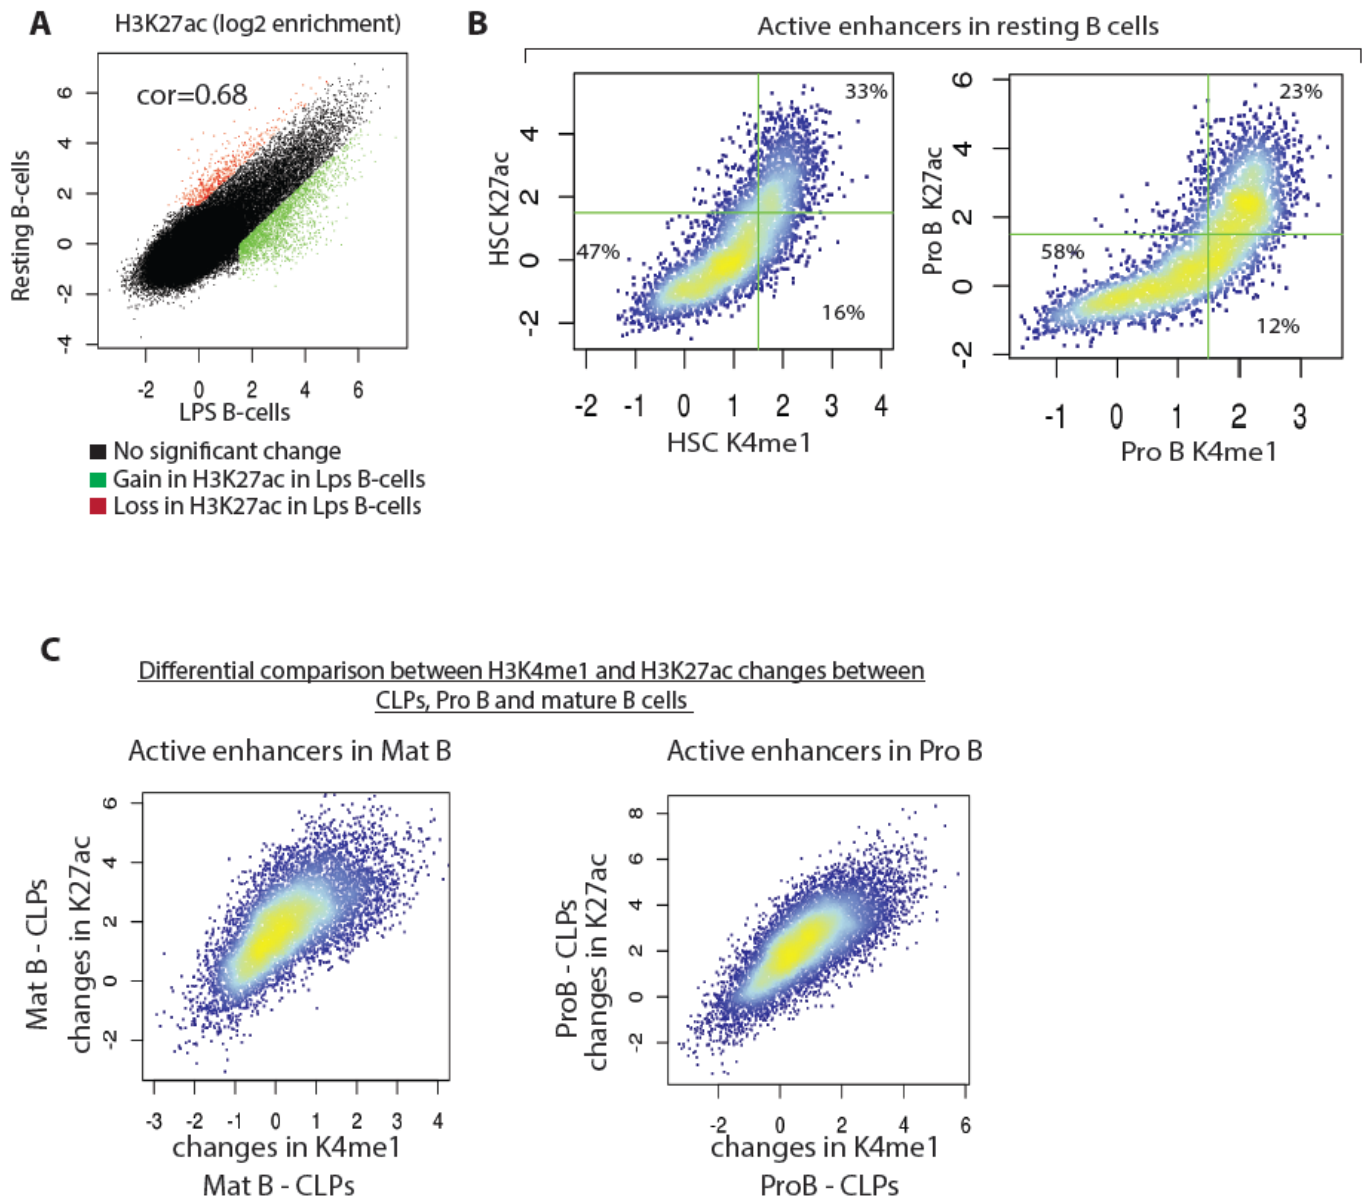

**Supplementary Fig. 5:** Comparison of active enhancers in resting and LPS-activated B cells.

**A.** H3K27ac enrichment (over input) in 1kb sliding windows across the genome for LPS-stimulated and resting B cells. Loci with no change in H3K27ac signal between the two conditions are colored in black, loci showing an increase in H3K27ac signal in LPS stimulated cells compared to resting cells are colored in green and loci with a decreased H3K27ac enrichment are colored in red. A 1.5 fold cut-off was used to select differentially enriched loci.

**B.** The chromatin state of active enhancers in resting B cells (identified based on H3K27ac signal) was investigated in HSCs (left panel) and Pro B cells (right panel).

**C.** Scatter plots for changes in H3K27ac and H3K4me1 between mature B cells and CLPs (left panel) and between Pro B cells and CLPs (right panel).

**A** Distribution of expression values (log2 scale)

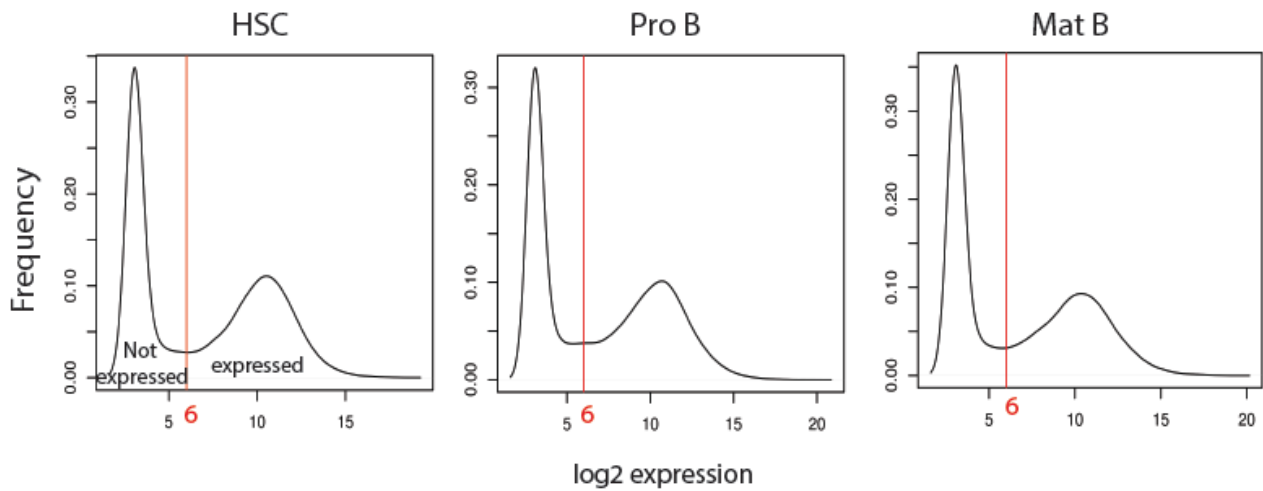

**Supplementary Fig. 6:** Gene classification according to expression level.

**A.** Histograms showing the distribution of the log<sub>2</sub> expression levels as determined by RNA-sequencing experiments (see Material and Methods) in HSCs, Pro B and mature B cells. The cut-off to classify a gene as expressed was set to 6 (red horizontal line).

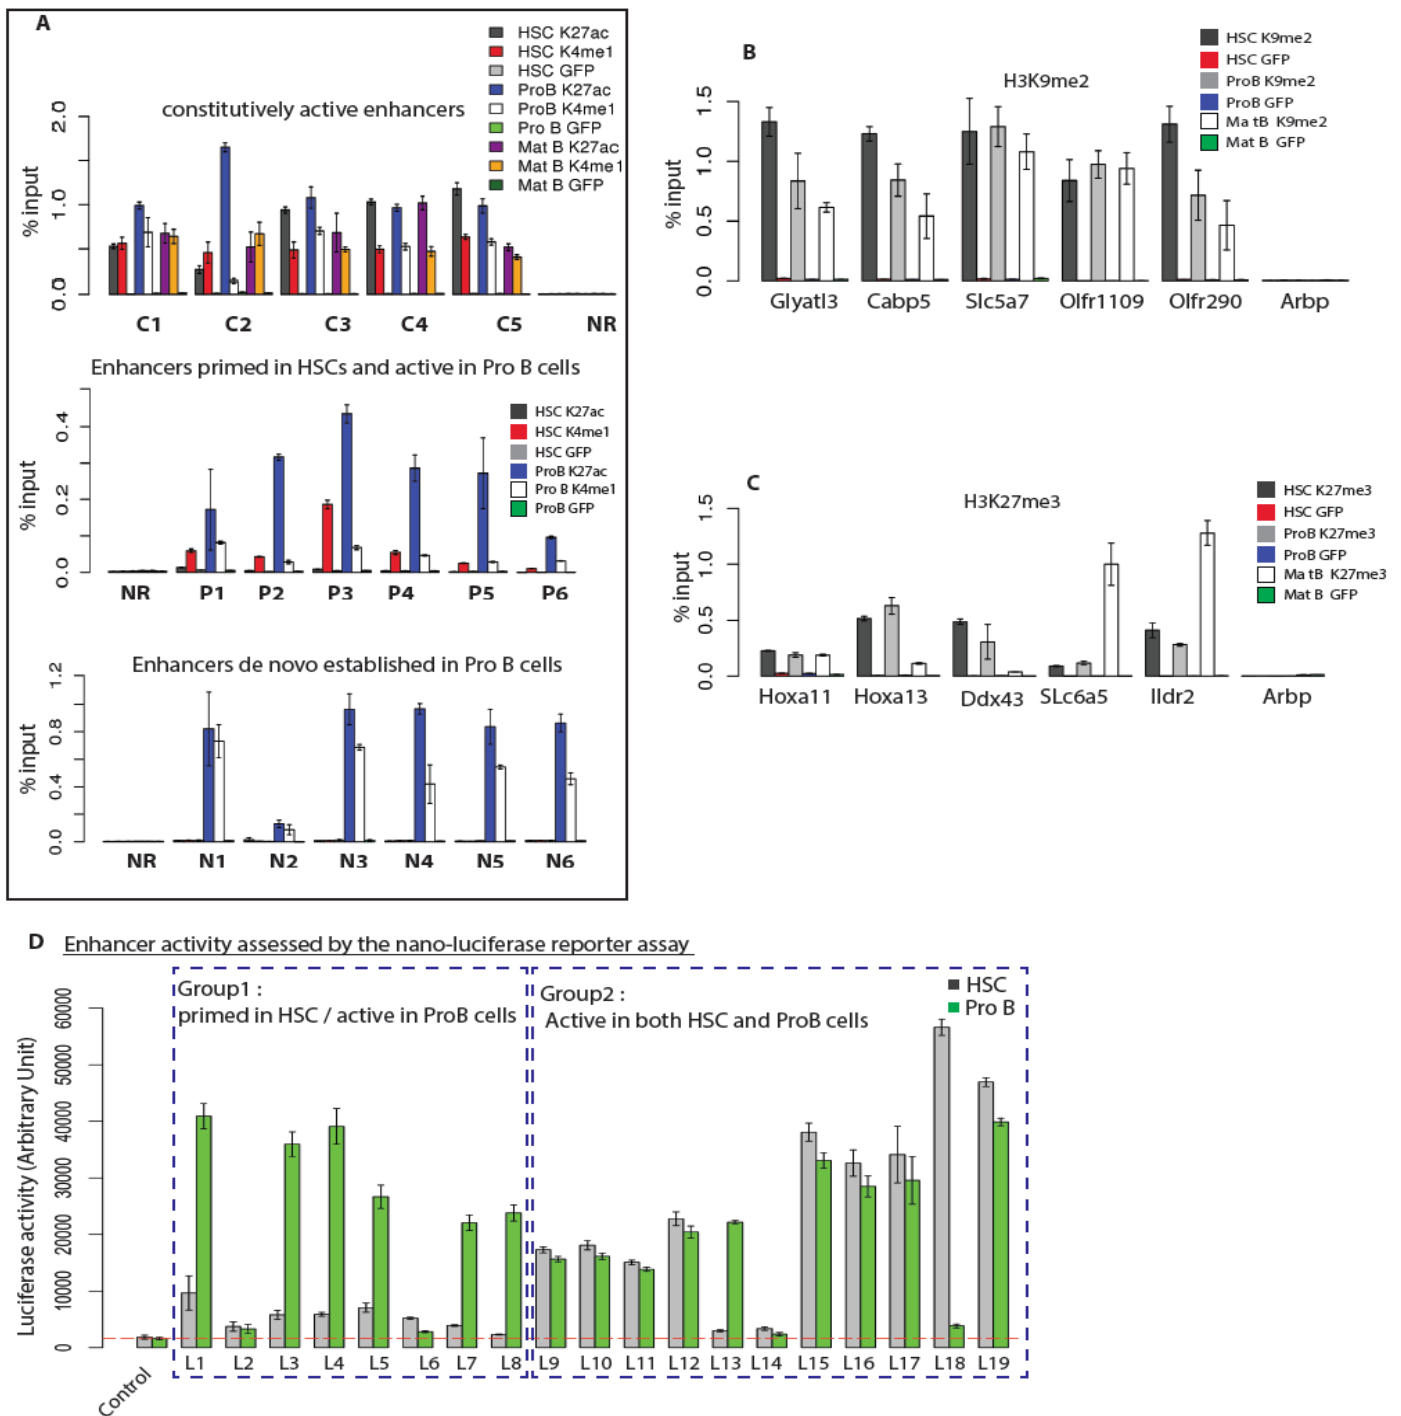

**Supplementary Fig. 7:** ChIP qPCR and reporter assays validation of ChIP sequencing data.

**A.** A subset of enhancers from different categories were validated by independent ChIP qPCR experiments; the first panel represents constitutively active enhancers (C1 to C5), the second panel represents enhancers primed in HSCs and active in Pro B cells (P1 to P6) and the third panel represents enhancers de novo generated in Pro B cells (N1 to N6). The testis specific locus Protamine1 was used as a negative control. Genomic Coordinates of these loci are provided into supplementary Table 3.

**B and C.** A subset of genes enriched in H3K9me2 (B) and H3K27me3 (C) marks were investigated by ChIP qPCR; the highly expressed ribosomal protein gene *Arbp* was used as a negative control.

**D.** Luciferase activity for a subset of primed and active enhancers in HSCs and Pro B cells. The coordinates of the loci used in this figure are given in the table S1.

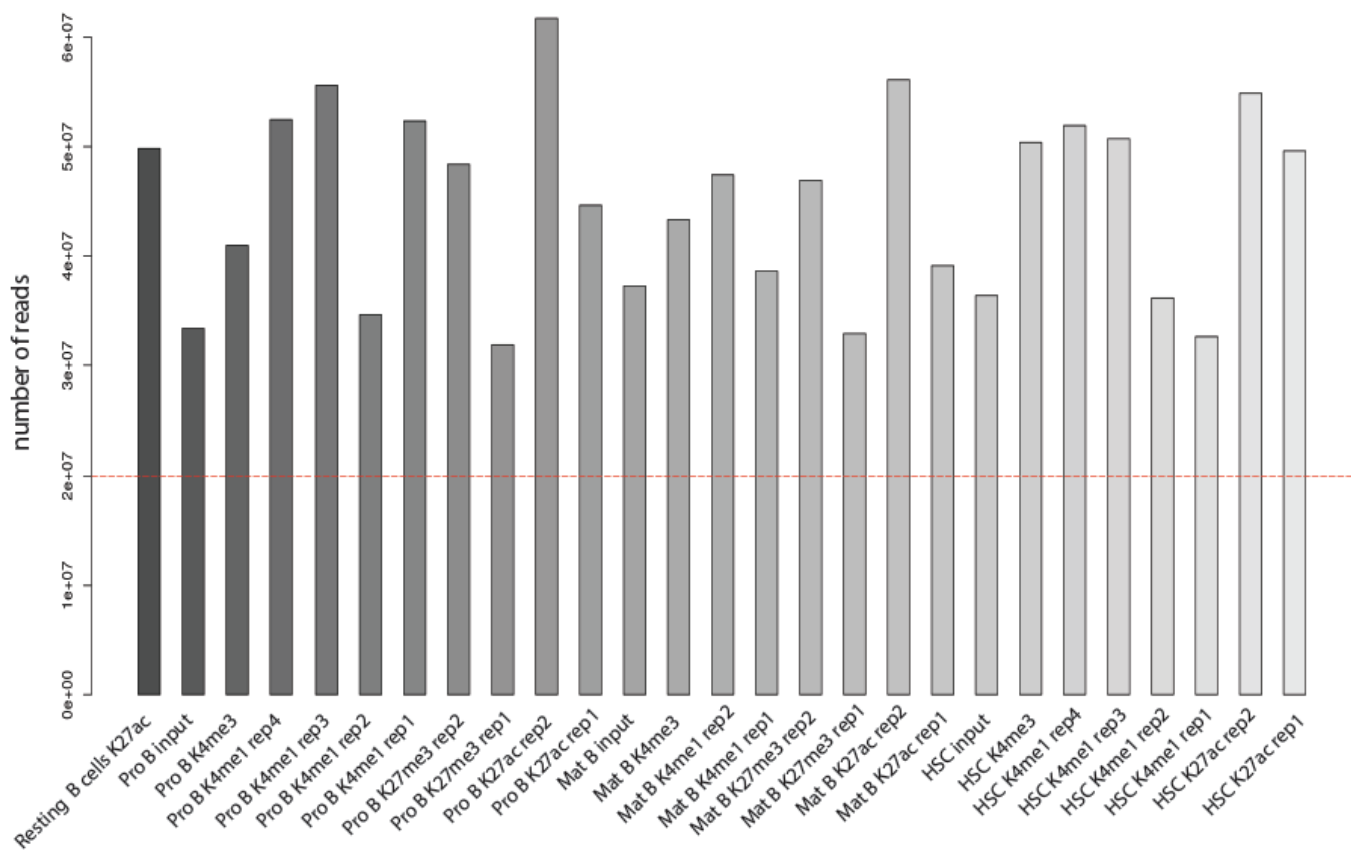

**Supplementary Fig. 8:** Barplot representing the number of reads for each CHIP-sequencing experiment.



## Supplementary Tables

**Supplementary Table 1:** Coordinates of enhancers used in reporter assays (Figure 1D, Supplementary Fig. 7D).

| Locus Name | Coordinates                |
|------------|----------------------------|
| L1         | chr11: 100591638-100592913 |
| L2         | chr2:118324225-118325286   |
| L3         | chr19: 47612048- 47613191  |
| L4         | chr1: 129108567-129109172  |
| L5         | chr2: 90371166-90372676    |
| L6         | chr1:130571787-130572987   |
| L7         | chr7:133559137-133561153   |
| L8         | chr10:94605090-94606684    |
| L9         | chr2:144056107-144057375   |
| L10        | chr11: 100591638-100592913 |
| L11        | chr2:118324225-118325286   |
| L12        | chr9:45081937-45082864     |
| L13        | chr4:9601957-9602736       |
| L14        | chr4: 9603272- 9603860     |
| L15        | chr17:47658318-47659541    |
| L16        | chr9:13897323-13898563     |
| L17        | chr7:73378119-73379155     |
| L18        | chr16:92620823-92621911    |
| L19        | chr2:90921161-90925642     |

**Supplementary Table 2:** Public data sets used in this study.

| GEO sample ID | Sample            |
|---------------|-------------------|
| GSM1441284    | H3K27Ac_CLP       |
| GSM1441300    | H3K4me1_CLP       |
| GSM769031     | Spleen H3K4me1    |
| GSM1000138    | Spleen H3K27ac    |
| GSM769036     | Spleen H3K4me3    |
| GSM769037     | Spleen input      |
| GSM918705     | Thymus input      |
| GSM1000101    | Thymus H3K4me3    |
| GSM1000102    | Thymus H3K4me1    |
| GSM1000103    | Thymus H3K27ac    |
| GSM1164635    | HSC H3K27me3 rep1 |
| GSM1164636    | HSC H3K27me3 rep2 |

**Supplementary Table 3:** Coordinates and qPCR primers for enhancers verified by ChIP-qPCR in Supplementary Fig. 7A.

| <b>Locus Name</b> | <b>Coordinates</b>        | <b>fw primers</b>    | <b>rev primers</b>   |
|-------------------|---------------------------|----------------------|----------------------|
| C1                | chr2:144073306-144073986  | ttcagctggacacacacaca | ggctgtcctggaactctgtc |
| C2                | chr13:103482392-103483524 | gtgggtgccattgtgagtgc | atggcctactgcatttcctg |
| C3                | chr9:45081937-45082864    | ctggggaacagatttgatt  | aattctcccttccctcaa   |
| C4                | chr17:47658919-47660312   | agttggctcaatgggaacac | aaccactgttcagggtcag  |
| C5                | chr2:90921161-90925642    | aggtcatcaagttccgcaga | ctgagtgggtgggttctgat |
| P1                | chr18:35974566-35975392   | gattgccagagtgtggagt  | gcccacctggatctaactca |
| P2                | chr11:100589876-100591397 | gcaggggagtcagcagtaag | aagactgttctcggcttca  |
| P3                | chr2:118324225-118325286  | ggaagctgtgtggaaagctc | gtctcctaaggcagcaggtg |
| P4                | chr19:47612048-47613191   | tcagcctccctcctgtagaa | atatcgatcggccttgaatg |
| P5                | chr1:129108567-129109172  | acgcagtggaaggagaagaa | agtgatgatccatgatcc   |
| P6                | chr2:90371166-90372676    | accatctcggggaaaactct | gctggatggtggcagtaaat |
| N1                | chr7:108617991-108619209  | tgaggtggcaatgaaatgaa | caggtcccacacagtcattg |
| N2                | chr13:73847304-73848770   | gccagccagctgtttcttac | gctaaggatcgagtaagc   |
| N3                | chr11:45351843-45353015   | ttctgcaacatcctcactgc | catgaaagcggagacacaga |
| N4                | chr5:137154497-137155688  | gtaaaagctgtgggctgagg | acaccacaggtgagactcc  |
| N5                | chr5:83382743-83384187    | gaatgccccacgttaagaga | atgttctcccagcaaaccac |
| N6                | chr4:44683297-44688461    | agcgagttgtaaggtcaga  | catcacgcagcagaactctc |

**Supplementary Table 4:** Primers of genes verified by qPCR in Supplementary Fig. 7B and C.

| <b>Gene name</b> | <b>fw primers</b>    | <b>rev primers</b>      |
|------------------|----------------------|-------------------------|
| Glyat13          | ctgggtttccttctcatca  | accccgagactgacctacct    |
| Cabp5            | aggaggagttggcaaaggat | gaaactgcattggagcaggt    |
| Slc5a7           | cccccaaaaacatcaaact  | tgcatataaatggttccaaaaca |
| Olf1109          | tccccagttaccacaacaaa | catggaccaggaatcata      |
| Olf290           | tggggtcattactcccattg | acccaaaagacacaggccaac   |
| Arbp (rplp0)     | gtcgatggaaccagccaata | cctcccacaacaaaacaacc    |
| Hoxa11           | aggagccttcttctcagctc | ggccttcaaagtctttcc      |
| Hoxa13           | ccccttccatgttctgttg  | cttcaacttcttgggggcttt   |
| Ddx43            | cattagcccgtcatgaacct | gctagtgtctggctgggaac    |
| Slc6a5           | cattagcccgtcatgaacct | gctagtgtctggctgggaac    |
| Ildr2            | tcttatcgtgccagctgatg | acgaaggtggagtggaaacac   |
